# Supplementary material
Source: PubMed Central journal article supplement (PMC8026607)
Supplement: NIHMS1669593-supplement-1.pdf [file NIHMS1669593-supplement-1.pdf]

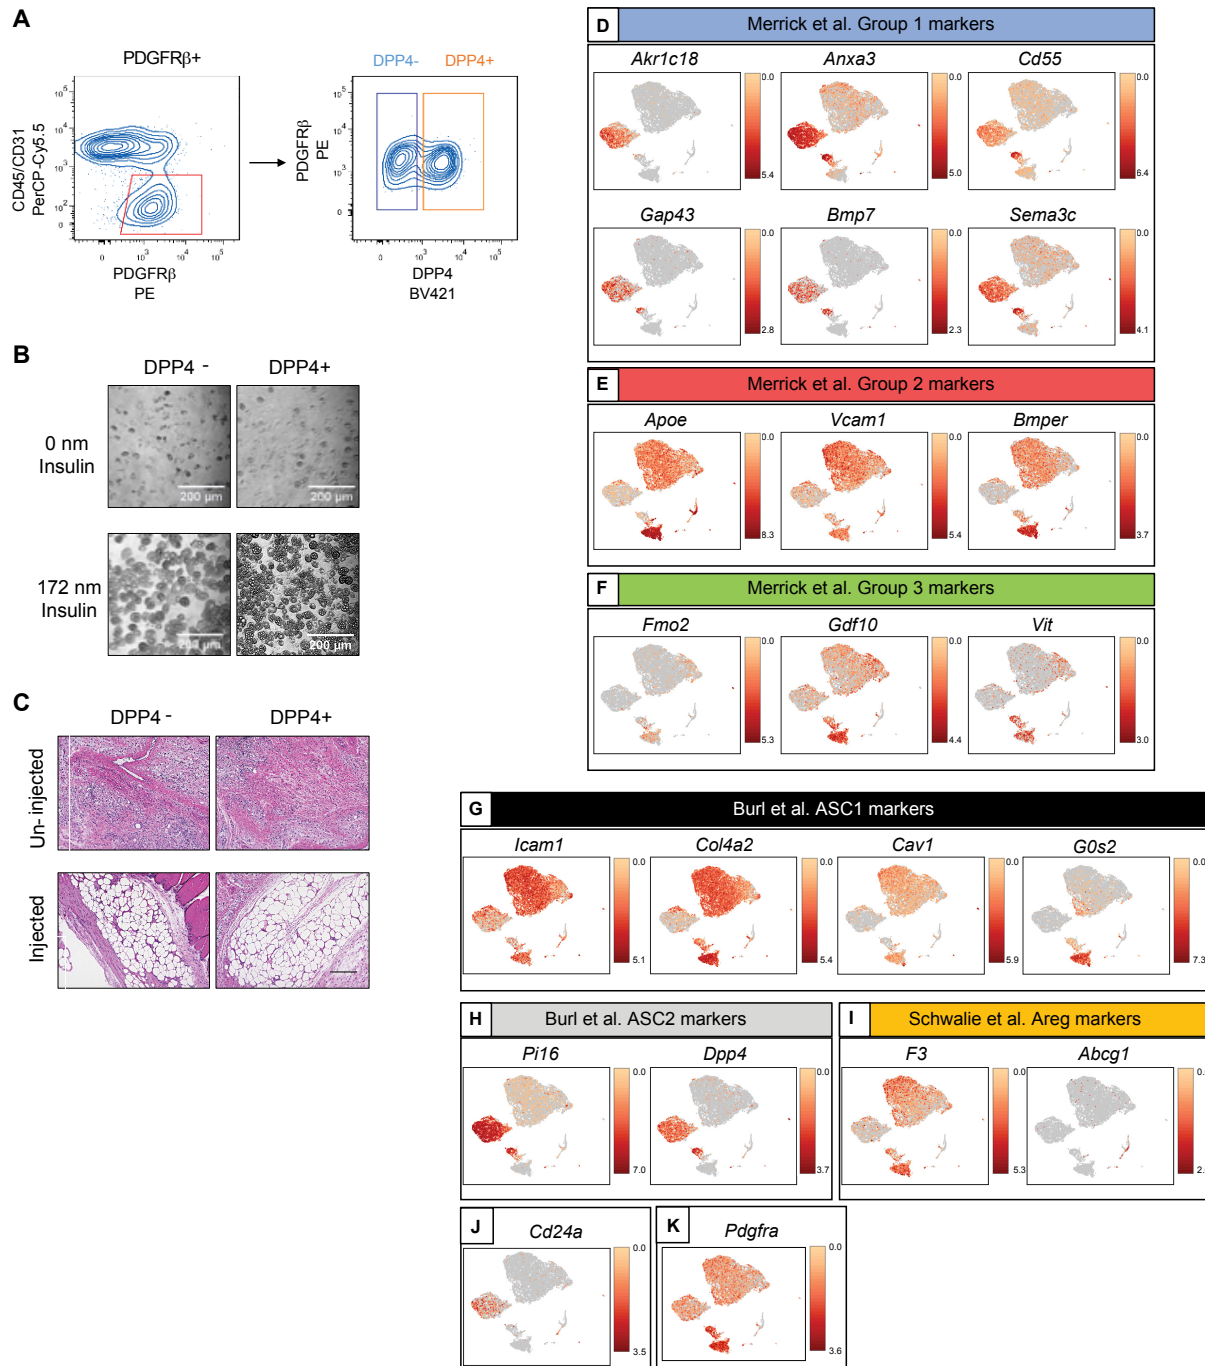

**Figure S1: Related to Figure 1. Adipogenic capacity of identified iWAT PDGFR $\beta$ <sup>+</sup> cell subpopulations and their expression of reported adipocyte precursor markers.**

(A) Representative FACS collection gates for the isolation of inguinal WAT PDGFR $\beta$ <sup>+</sup> mural cell subpopulations.

(B) Representative bright-field images of isolated inguinal DPP4<sup>-</sup> PDGFR $\beta$ <sup>+</sup> and DPP4<sup>+</sup> PDGFR $\beta$ <sup>+</sup> cells after 8 days of culture in growth media with or without insulin supplementation.

(C) Representative bright-field images of H&E stained inguinal WAT from lipodystrophic mice (*Adiponectin-Cre; Pparg*<sup>loxP/loxP</sup>) transplanted with 100,000 DPP4<sup>-</sup> PDGFR $\beta$ <sup>+</sup> cells or 100,000

DPP4+ PDGFR $\beta$ + cells isolated from iWAT of wildtype C57BL/6 mice. The depots were harvested 3 weeks after transplantation. Scale bar denotes 200  $\mu$ m.

(D) Heat map depicting expression of genes defining “Group 1” adipocyte progenitors (Merrick *et al.*) within iWAT and gWAT PDGFR $\beta$ + subpopulations.

(E) Heat map depicting expression of genes defining “Group 2” adipocyte progenitors (Merrick *et al.*) within iWAT and gWAT PDGFR $\beta$ + subpopulations.

(F) Heat map depicting expression of genes defining “Group 3” adipocyte progenitors (Merrick *et al.*) within iWAT and gWAT PDGFR $\beta$ + subpopulations.

(G) Heat map depicting expression of genes defining “ASC1” (Adipocyte Stem Cell 1) (Burl *et al.*) within iWAT and gWAT PDGFR $\beta$ + subpopulations.

(H) Heat map depicting expression of genes defining “ASC2” (Adipocyte Stem Cell 2) (Burl *et al.*) within iWAT and gWAT PDGFR $\beta$ + subpopulations.

(I) Heat map depicting expression of genes defining “Aregs” (Schwalie *et al.*) within iWAT and gWAT PDGFR $\beta$ + subpopulations.

(J) Heat map depicting expression of *CD24a* within iWAT and gWAT PDGFR $\beta$ + subpopulations.

(K) Heat map depicting expression of *Pdgfra* within iWAT and gWAT PDGFR $\beta$ + subpopulations.

Transcript counts represent Log2 of gene expression.

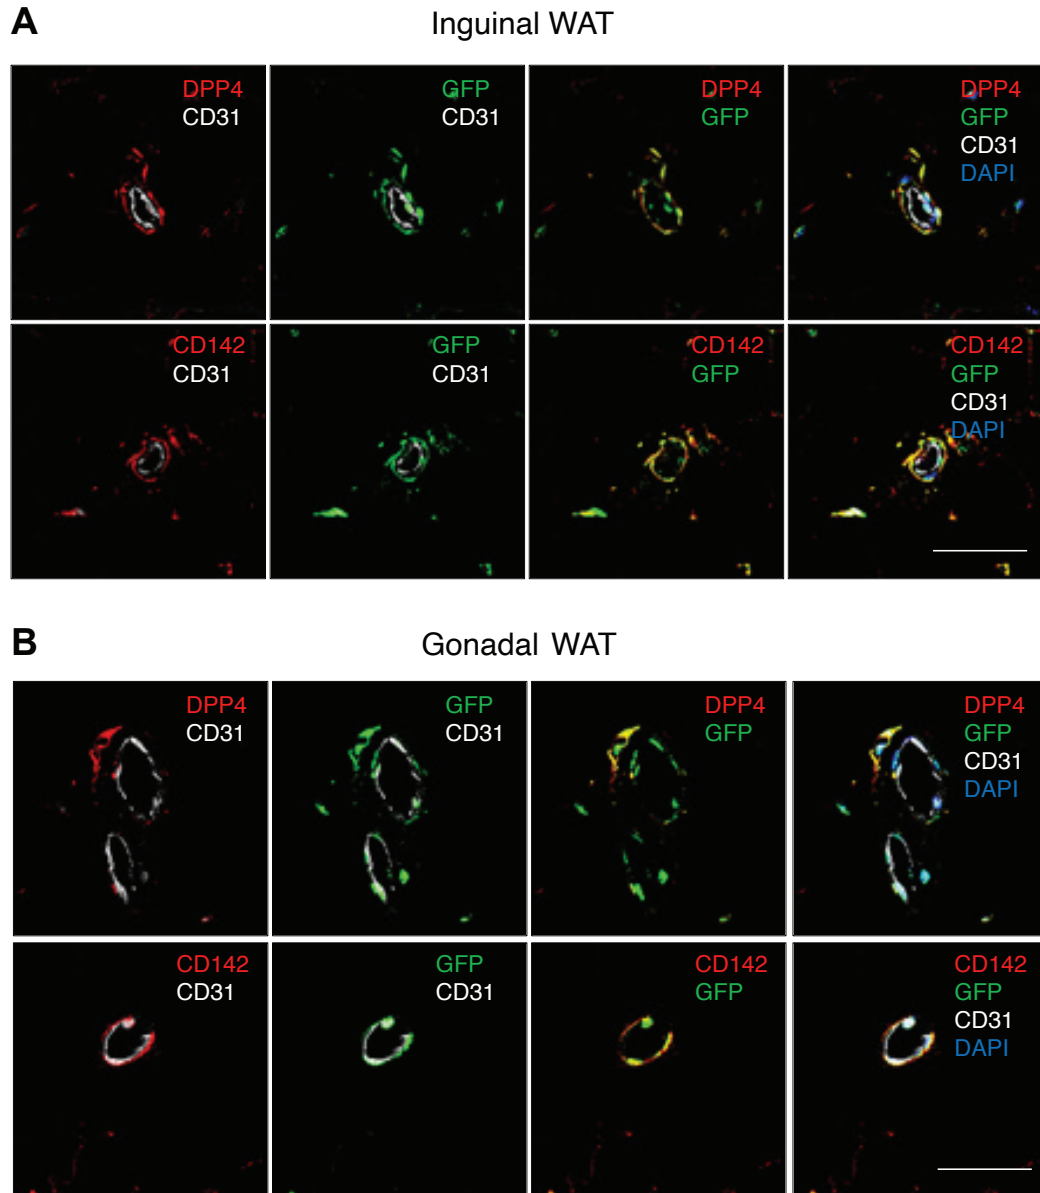

**Figure S2: Related to Figure 1. Perivascular localization of adipose tissue PDGFR $\beta$ + cell subpopulations.**

(A) Representative confocal immunofluorescence image of paraffin-embedded inguinal WAT sections from 8 week-old MuralChaser mice after 7 days of Dox-chow feeding.

(B) Representative confocal immunofluorescence image of paraffin-embedded gonadal WAT sections from 8 week-old MuralChaser mice after 7 days of Dox-chow feeding.

For panels A and B, sections were stained with antibodies recognizing GFP (identifying PDGFR $\beta$ + cells), DPP4 (identifying iWAT DPP4+ cells and gWAT FIPs), CD142 (identifying iWAT DPP4+ cells and gWAT APCs), and CD31 (identifying endothelial cells).

Scale bar denotes 50  $\mu$ m.

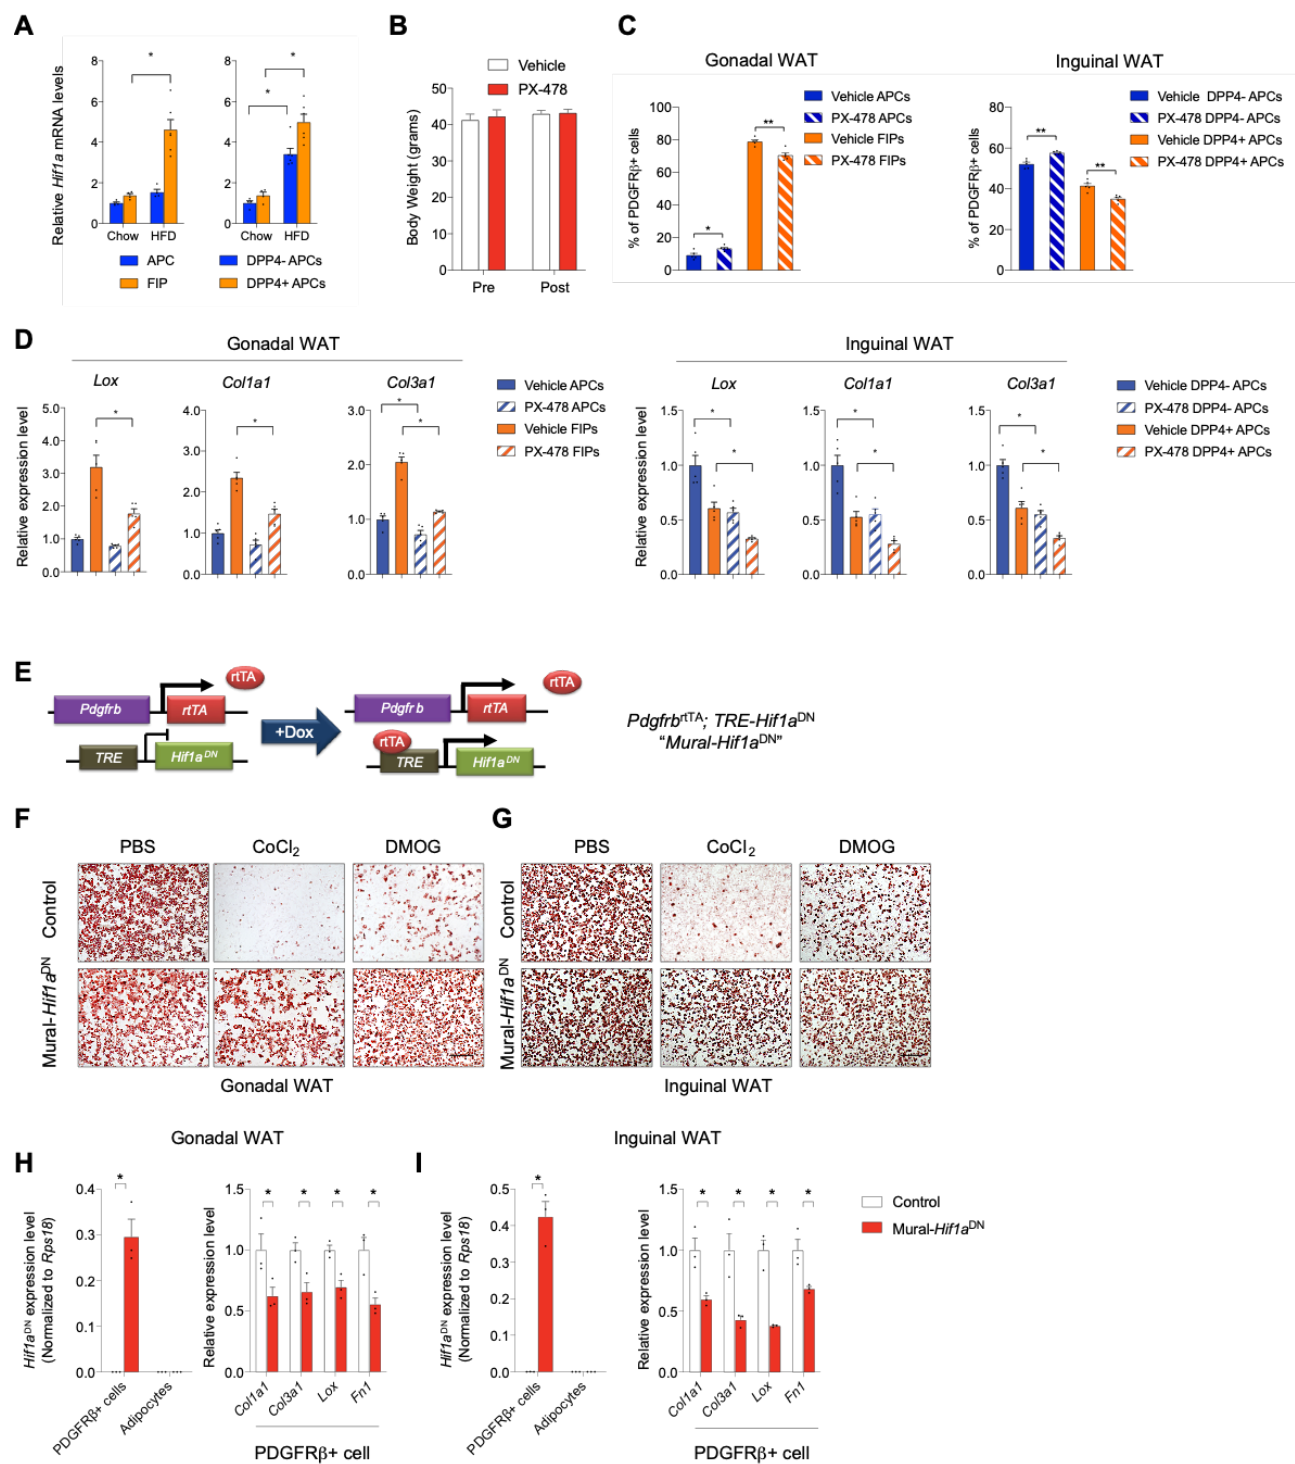

**Figure S3: Related to Figure 3. HIF $\alpha$  regulates fibrogenic gene expression in WAT PDGFR $\beta$ <sup>+</sup> progenitor subpopulations.**

(A) mRNA levels of *Hif1a* within freshly isolated gonadal WAT APCs and FIPs, inguinal WAT DPP4- PDGFR $\beta$ <sup>+</sup> and DPP4+ PDGFR $\beta$ <sup>+</sup> cells from chow-fed mice or aged-matched animals

maintained on HFD for 10 weeks. Bars represent mean + s.e.m. \* denotes  $p < 0.05$  by two-way ANOVA. Each sample (n) represents 10,000 freshly isolated cells from 2-3 individual depots.  $n=6$  for HFD FIPs.  $n=4$  for all other subpopulations analyzed.

(B) C57BL/6 wildtype mice were fed a standard chow diet until 8 weeks of age before being switched to HFD for 10 weeks. Mice were then maintained on HFD for an additional 7 days, during which vehicle or PX-478 (5mg/kg) was administered daily by i.p. injection. Body weights were measured before (Pre) and after (Post) the treatment.

(C) Relative frequency of PDGFR $\beta$ + subpopulations within gWAT (left) and iWAT (right) of mice after vehicle or PX-478 treatment.  $n= 5$  per group. Bars represent mean + s.e.m. \* denotes  $p < 0.05$  by two-way ANOVA.

(D) mRNA levels of indicated fibrosis-related genes within gWAT APCs and FIPs, iWAT DPP4- and DPP4+ PDGFR $\beta$ + cells from mice after vehicle or PX-478 treatment.  $n= 5$  per group. Bars represent mean + s.e.m. \* denotes  $p < 0.05$  by two-way ANOVA.

(E) *Pdgfrb*<sup>rtTA</sup>; *TRE-Hif1a*<sup>DN</sup> (Mural-*Hif1a*<sup>DN</sup>) mice are generated by breeding the *Pdgfrb*<sup>rtTA</sup> transgenic mice to animals expressing dominant negative *Hif1a* under the control of the tet-response element (*TRE-Hif1a*<sup>DN</sup>). The addition of doxycycline activates transgene expression. Littermates carrying only *Pdgfrb*<sup>rtTA</sup> or *TRE-Hif1a*<sup>DN</sup> alleles represent Control animals.

(F) Representative bright-field images of Oil-red O stained cultures of adipocytes differentiated from gonadal WAT APCs isolated from Control or Mural-*Hif1a*<sup>DN</sup> mice.

(G) Representative bright-field images of Oil-red O stained cultures of adipocytes differentiated from inguinal WAT PDGFR $\beta$ + cells isolated from Control or Mural-*Hif1a*<sup>DN</sup> mice.

For (F) and (G), cells were induced to differentiate in the presence of doxycycline (2  $\mu$ M) and either PBS (vehicle), CoCl<sub>2</sub> (50  $\mu$ M), or DMOG (50  $\mu$ M). Oil-red O staining was performed 7 days after the induction of adipogenic differentiation. Scale bar denotes 50  $\mu$ m.

(H) mRNA levels of *dnHif1a* transgene and fibrosis-associated genes in freshly isolated PDGFR $\beta$ + stromal cells or fractionated adipocytes from gonadal WAT of 8-week old Control or Mural-*Hif1a*<sup>DN</sup> mice.

(I) mRNA levels of *dnHif1a* transgene and fibrosis-associated genes in freshly isolated PDGFR $\beta$ + stromal cells or fractionated adipocytes from inguinal WAT of 8-week old Control or Mural-*Hif1a*<sup>DN</sup> mice.

For panels H and I, Control or Mural-*Hif1a*<sup>DN</sup> mice were fed with Dox-containing chow diet for 7 days prior to harvest.  $n= 3$ . Bars represent mean + s.e.m. \* denotes  $p < 0.05$  by Student's t-test.

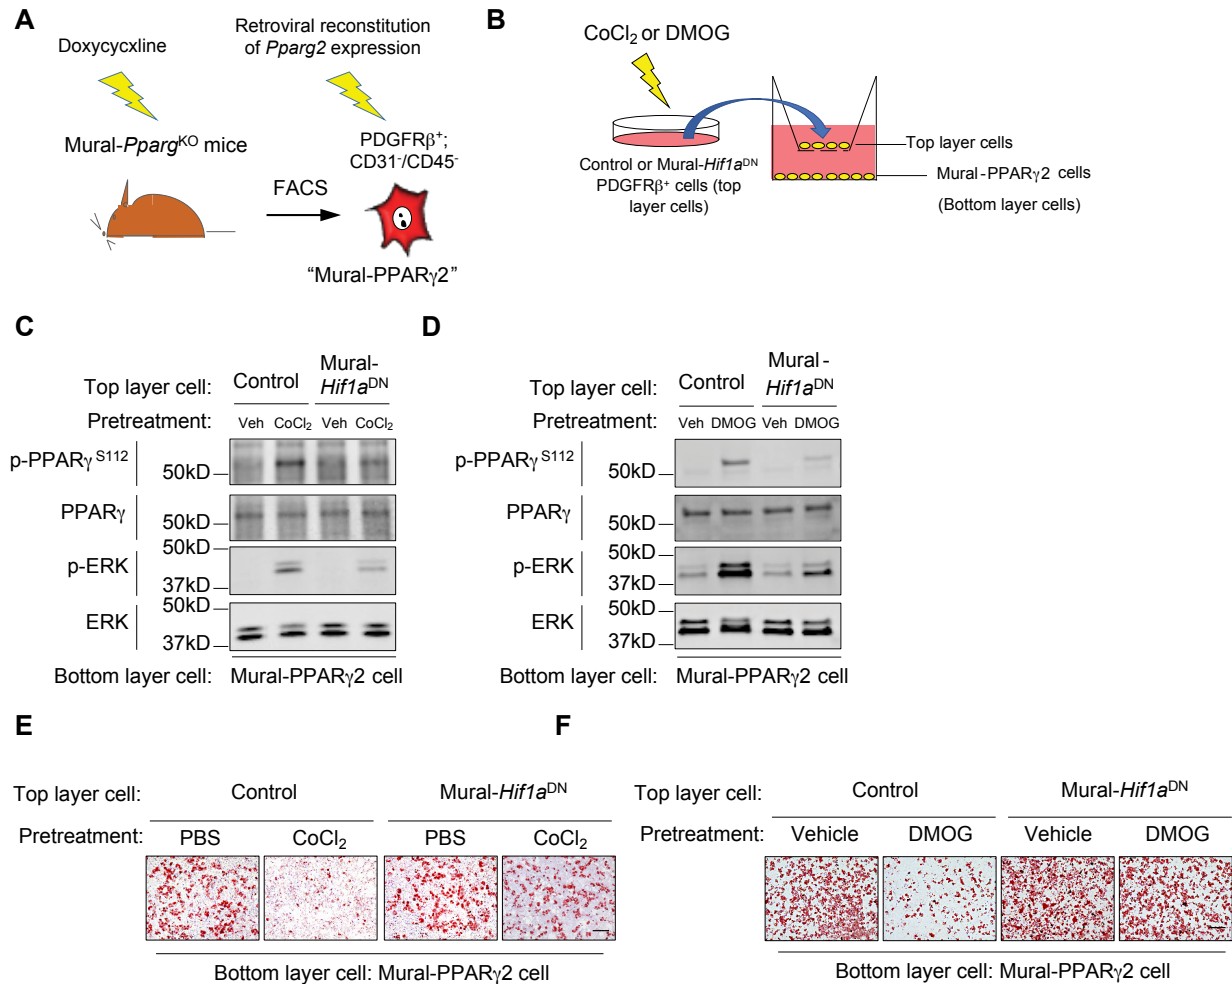

**Figure S4: Related to Figure 6. HIF $\alpha$  activation induces PPAR $\gamma$  S112 phosphorylation through autocrine/paracrine signaling mechanisms.**

(A) Derivation of stable Mural-PPAR $\gamma$ 2 cells: *Pparg*-deficient iWAT PDGFR $\beta$ <sup>+</sup> cells were isolated by FACS from Doxycycline-treated Mural-*Pparg*<sup>KO</sup> mice (Dox-chow diet for 7 days) and then transduced in vitro with retrovirus expressing FLAG-PPAR $\gamma$ 2.

(B) Design of co-culture experiments: iWAT PDGFR $\beta$ <sup>+</sup> cells from Control or Mural-*Hif1a*<sup>DN</sup> mice were treated with 50 $\mu$ M CoCl<sub>2</sub> or 50 $\mu$ M DMOG, for 48 hours. After washing, cells were transferred to transwell membranes (Top layer cells) overlaying stable Mural-PPAR $\gamma$ 2 cells (without CoCl<sub>2</sub> or DMOG) (Bottom later cells). Co-culture of top and bottom layers of cells were performed in serum free media for 6 hours before the bottom layer cells were harvested for western blot analysis of PPAR $\gamma$  phosphorylation or top and bottom layers of cells were co-cultured in adipogenic induction media for 48 hours before the top layer cells were removed. The bottom layer cells were then kept in maintenance media until oil-red O staining was performed 7 days after the adipogenic induction.

(C) Western blot analysis of levels of phosphorylated PPAR $\gamma$ , total PPAR $\gamma$ , phosphorylated ERK, and total ERK, in bottom layer Mural-PPAR $\gamma$ 2 cells co-cultured with top layer CoCl $_2$ -treated Control or Mural-*Hif1a*<sup>DN</sup> cells.

(D) Oil-red O staining of adipocytes differentiated from bottom layer Mural-PPAR $\gamma$ 2 cells co-cultured with top layer CoCl $_2$ -treated Control or Mural-*Hif1a*<sup>DN</sup> cells 7 days after adipogenic induction.

(E) Western blot analysis of levels of phosphorylated PPAR $\gamma$ , total PPAR $\gamma$ , phosphorylated ERK, and total ERK, in bottom layer Mural-PPAR $\gamma$ 2 cells co-cultured with top layer DMOG-treated Control or Mural-*Hif1a*<sup>DN</sup> cells.

(F) Oil-red O staining of adipocytes differentiated from bottom layer Mural-PPAR $\gamma$ 2 cells co-cultured with top layer DMOG-treated Control or Mural-*Hif1a*<sup>DN</sup> cells 7 days after adipogenic induction.

Scale bar in D, F denotes 200  $\mu$ m.



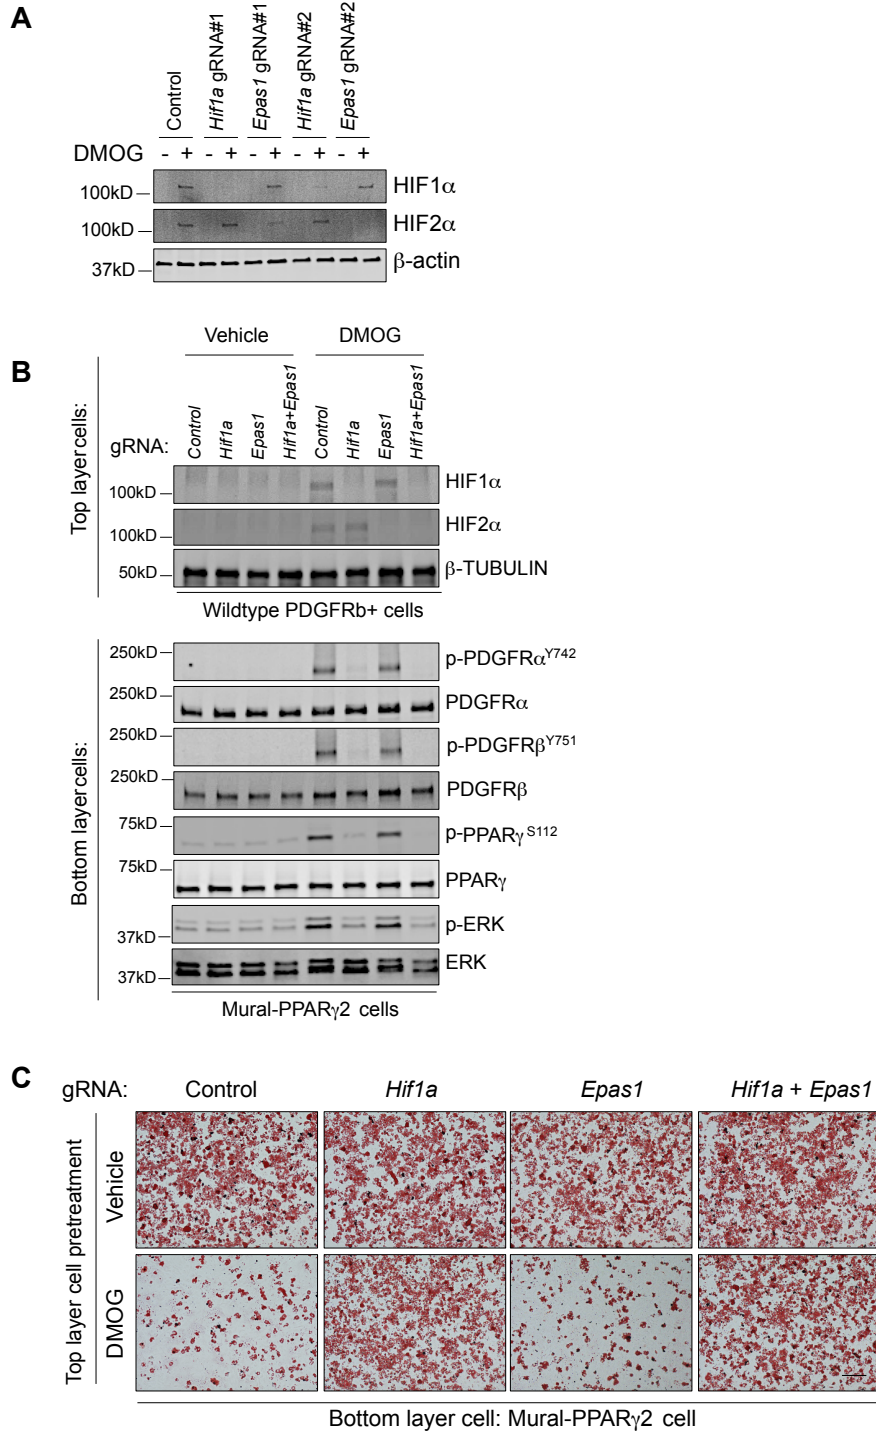

**Figure S5: Related to Figure 6. HIF1 $\alpha$ , but not HIF2 $\alpha$ , mediates the inhibitory effects of DMOG on PPAR $\gamma$  activation in PDGFR $\beta$ + cells.**

(A) Western blot analysis for HIF1 $\alpha$ , HIF2 $\alpha$ , and  $\beta$ -actin in iWAT PDGFR $\beta$ + cells transduced with the indicated CRISPR lentivirus.



(B) iWAT PDGFR $\beta$ <sup>+</sup> cells from C57BL/6 wildtype mice were transduced with the indicated CRISPR lentivirus and treated with vehicle or 50  $\mu$ M DMOG for 48 hours. After washing, cells were transferred to transwell membranes (Top layer cells) overlaying stable Mural-PPAR $\gamma$ 2 cells (without DMOG) (Bottom layer cells). Co-cultures were maintained in serum free media for 6 hours before bottom layer cells were harvested for western blot analysis of HIF1 $\alpha$ , HIF2 $\alpha$ , phosphorylated/total PDGFR $\alpha$ , phosphorylated/total PDGFR $\beta$ , phosphorylated/total PPAR $\gamma$ , and phosphorylated/total ERK.

(C) Parallel co-cultures as described in (B) were established to assay for adipogenesis of Mural-PPAR $\gamma$ 2 cells. Bright-field image of lipid accumulation (Red) were captured 7 days after inducing adipogenesis of Mural-PPAR $\gamma$ 2 cells exposed to the indicated cells/treatments. Scale bar denotes 200  $\mu$ m.

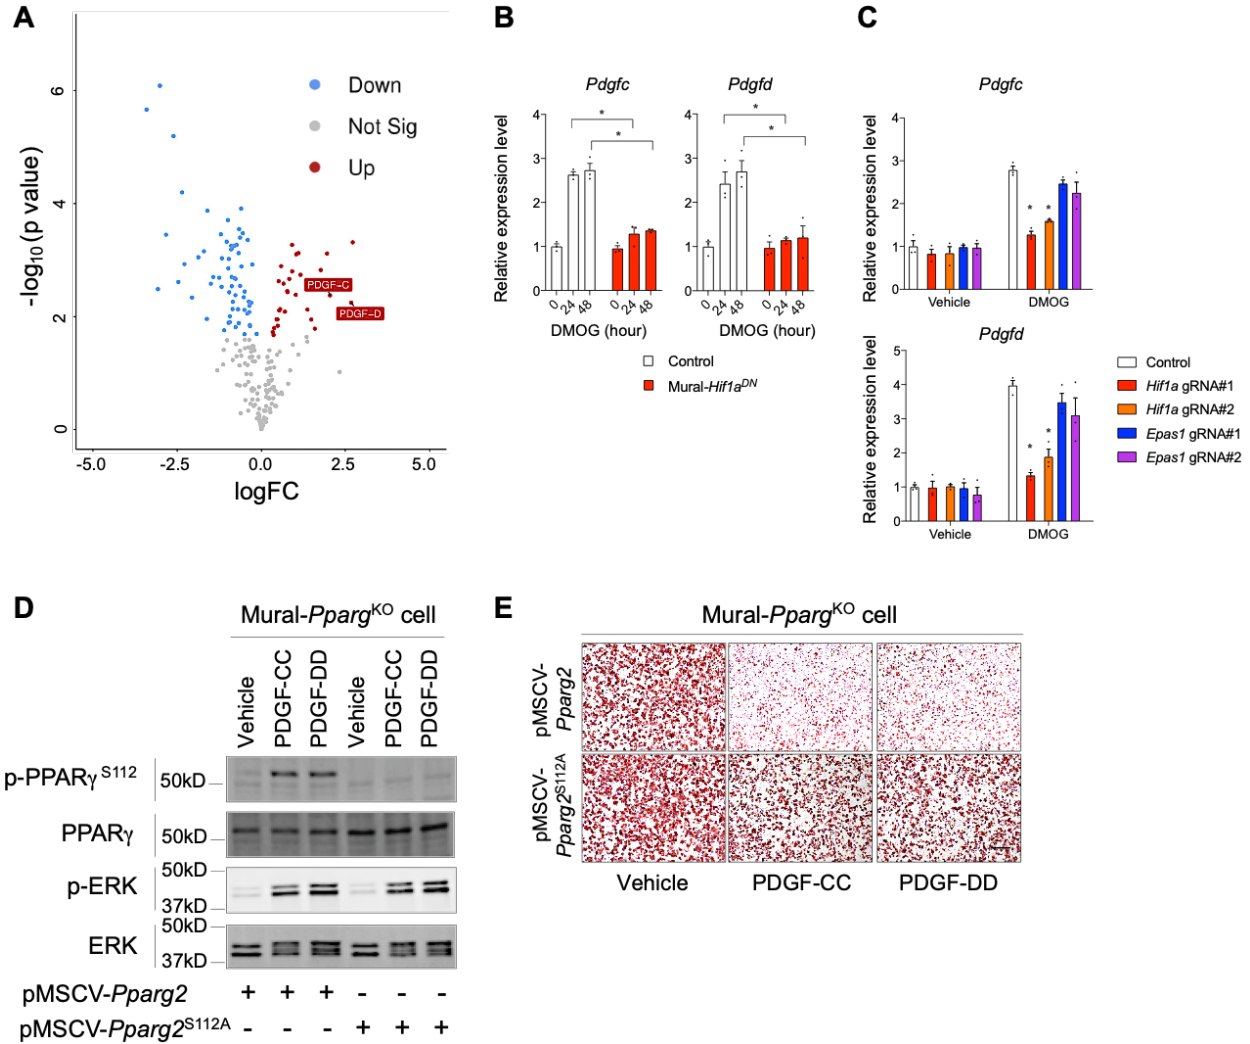

**Figure S6: Related to Figure 6. HIF $\alpha$ -activation drives production of anti-adipogenic PDGF-CC and PDGF-DD in adipose PDGFR $\beta$ <sup>+</sup> cells.**

(A) Volcano plot depicting proteins differentially secreted from cultured PDGFR $\beta$ <sup>+</sup> cells following exposure to the HIF1 stabilizer, DMOG. Secreted proteins annotated in the Uniprot database are shown. DMOG treatment results in increased production of PDGF-C and PDGF-D (See Table S3 for full list of identified proteins).

(B) mRNA levels of *Pdgfc* and *Pdgfd* within cultured inguinal PDGFR $\beta$ <sup>+</sup> cells at indicated time points following 50  $\mu$ M DMOG treatment. n = 3. Bars represent mean + s.e.m. \* denotes p < 0.05 by Student's t-test.

(C) mRNA levels of *Pdgfc* and *Pdgfd* within cultured inguinal PDGFR $\beta$ <sup>+</sup> cells transduced with the indicated CRISPR lentivirus following vehicle or 50  $\mu$ M DMOG treatment for 24 hours. n = 3. Bars represent mean + s.e.m. \* denotes p < 0.05 by one-way ANOVA.

(D) *Pparg*-deficient Mural-*Pparg*<sup>KO</sup> cells transduced with virus expressing PPAR $\gamma$ 2, or the PPAR $\gamma$ 2 S112A variant were treated with 10  $\mu$ M recombinant PDGF-CC or PDGF-DD for 30 min. Levels

of phosphorylated PPAR $\gamma$ , total PPAR $\gamma$ , phosphorylated ERK, and total ERK, were determined by western blot analysis.

(E) Oil-red O staining of differentiated cultures of *Pparg*-deficient Mural-*Pparg*<sup>KO</sup> cells transduced with virus expressing PPAR $\gamma$ 2 or the PPAR $\gamma$ 2 S112A variant and treated with PDGF-CC or PDGF-DD. Cells were induced to differentiate with adipogenic induction media in the presence of 10  $\mu$ M recombinant PDGF-CC or PDGF-DD for 48 hours. The treated cells were then cultured in maintenance media for an additional five days before fixation and staining. Scale bar denotes 200  $\mu$ m.

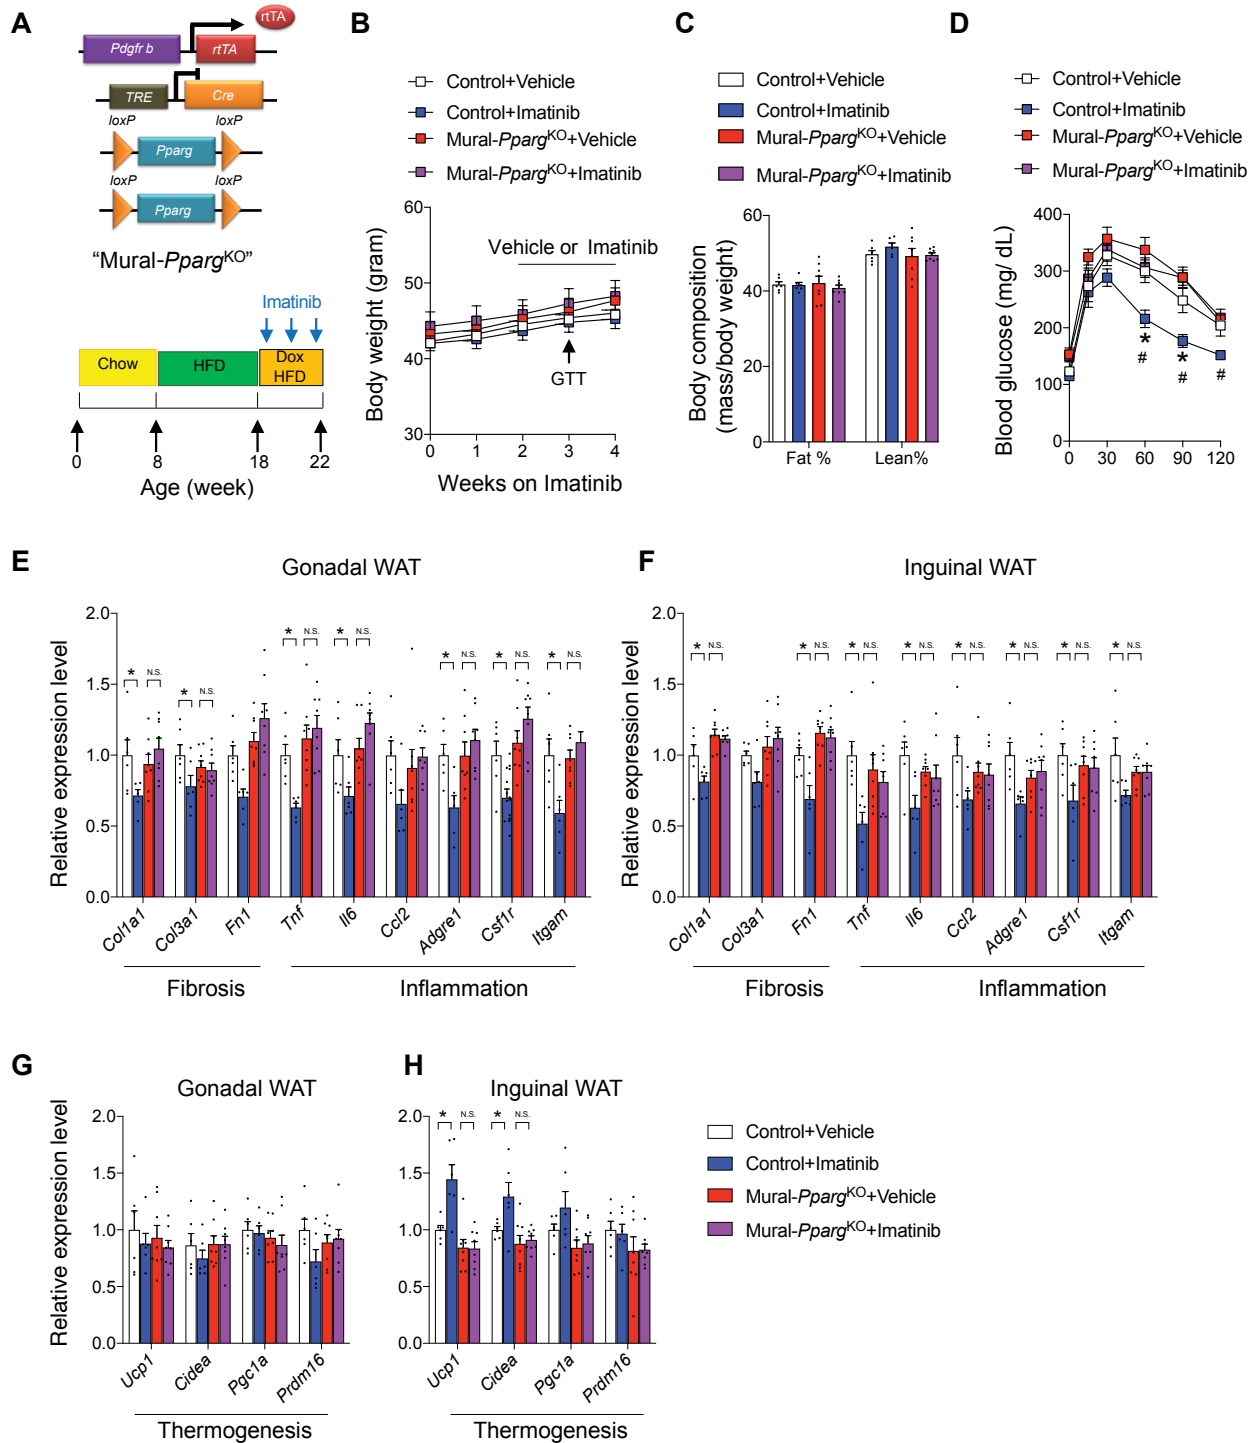

**Figure S7: Related to Figure 7. The beneficial effects of Imatinib on WAT and glucose tolerance depend on mural cell PPAR $\gamma$ .**

(A) Experimental design: Control and Mural-*Pparg*<sup>KO</sup> mice were kept on a standard chow diet (Chow) until 8 weeks of age before being switched to HFD for another 10 weeks. To inactivate

mural cell PPAR $\gamma$ , the mice were then administered doxycycline-containing HFD (Dox-HFD) for an additional 4 weeks, during which vehicle or Imatinib was administered four times weekly (25mg/kg) by i.p. injection.

(B) Average weekly body weights during Imatinib administration.

(C) Average fat mass and lean mass (normalized to body weight) of Control and Mural-*Pparg*<sup>KO</sup> mice after 4 weeks of Imatinib administration.

(D) Glucose tolerance tests of Control or Mural-*Pparg*<sup>KO</sup> mice after 3 weeks of Imatinib administration.

For panels B-D, n= 6 for Control mice +/- Imatinib. n=8 for Mural-*Pparg*<sup>KO</sup> mice +/- Imatinib. Data points represent mean + s.e.m. \* denotes p< 0.05 between Control + Vehicle and Control + Imatinib by two-way ANOVA; # denotes p< 0.05 between Control + Imatinib and Mural-*Pparg*<sup>KO</sup> + Imatinib by two-way ANOVA.

(E) mRNA levels of fibrosis- and inflammation-related genes in whole gonadal WAT of Control and Mural-*Pparg*<sup>KO</sup> mice after 4 weeks of Imatinib administration.

(F) mRNA levels of fibrosis- and inflammation-related genes in whole inguinal WAT of Control and Mural-*Pparg*<sup>KO</sup> mice after 4 weeks of Imatinib administration.

(G) mRNA levels of thermogenesis-related genes in whole gonadal WAT of Control and Mural-*Pparg*<sup>KO</sup> mice after 4 weeks of Imatinib administration.

(H) mRNA levels of thermogenesis-related genes in whole inguinal WAT of Control and Mural-*Pparg*<sup>KO</sup> mice after 4 weeks of Imatinib administration.

For panels E-H, n= 6 mice per genotype. Bars represent mean + s.e.m. \* denotes p< 0.05 by two-way ANOVA.

**Table S4: Related to STAR Methods- Gene Expression Analysis. Primer sequences for qPCR**

| <b>Gene</b>        | <b>Forward (5' -3')</b>    | <b>Reverse (5' -3')</b>   |
|--------------------|----------------------------|---------------------------|
| <i>Acta2</i>       | TGACGCTGAAGTATCCGATAGA     | GTACGTCCAGAGGCATAGAGG     |
| <i>Adgre1</i>      | ATGGACAAACCAACTTTCAAGGC    | GCAGACTGAGTTAGGACCACAA    |
| <i>Adipoq</i>      | AGATGGCACTCCTGGAGAGAA      | TTCTCCAGGCTCTCCTTTCT      |
| <i>Ccl2</i>        | CCACAACCACCTCAAGCACTTC     | AAGGCATCACAGTCCGAGTCAC    |
| <i>Cidea</i>       | TCCTATGCTGCACAGATGACG      | TGCTCTTCTGTATCGCCCAGT     |
| <i>Col1a1</i>      | AGATGATGGGGAAGCTGGCAA      | AAGCCTCGGTGTCCCTTCATT     |
| <i>Col1a2</i>      | GTAACCTCGTGCCTAGCAACA      | CCTTTGTCAGAATACTGAGCAGC   |
| <i>Col3a1</i>      | ATTCTGCCACCCCGAACTCAA      | ACAGTCATGGGGCTGGCATT      |
| <i>Col5a1</i>      | TGTCATGTTTGGCTCCCGGAT      | AGTCATAGGCAGCTCGGTTGT     |
| <i>Csf1r</i>       | TGTCATCGAGCCTAGTGGC        | CGGGAGATTCAGGGTCCAAG      |
| <i>Fn1</i>         | GAGAGCACACCCGTTTTTCATC     | GGGTCCACATGATGGTGACTT     |
| <i>Il6</i>         | AAGCCAGAGTCCTTCAGAGAGA     | ACTCCTTCTGTGACTCCAGCTT    |
| <i>Itgam</i>       | GGCTCCGGTAGCATCAACAA       | ATCTTGGGCTAGGGTTTCTCT     |
| <i>Lox</i>         | TCGCTACACAGGACATCATGC      | ATGTCCAAACACCAGGTACGG     |
| <i>Pgc1a</i>       | GGTGCTTTAGAAATGCGGGGT      | AGGTTCCCTCTCTGCTGCTTT     |
| <i>Pparg2</i>      | GCATGGTGCCTTCGCTGA         | TGGCATCTCTGTGTCAACCATG    |
| <i>Prdm16</i>      | ACACGCCAGTTCTCCAACCTGT     | TGCTTGTTGAGGGAGGAGGTA     |
| <i>Rps18</i>       | CATGCAAACCCACGACAGTA       | CCTCACGCAGCTTGTTGTCTA     |
| <i>Tgfb1</i>       | ATTCCTGACTGTGCCAAGGG       | GCCGGACTGCTTGATTACAT      |
| <i>Timp1</i>       | CTTGGTTCCTGGCGTACTC        | ACCTGATCCGTCCACAAACAG     |
| <i>Tnfa</i>        | GAAAGGGGATTATGGCTCAGG      | TCACTGTCCCAGCATCTTGTG     |
| <i>TRE-dnHif1a</i> | CAGATATGAAGATGACTCAGCTGTTT | CAAGGGACATCTTCCCATTCTAAAC |
| <i>Ucp1</i>        | TCTCAGCCGGCTTAATGACTG      | GGCTTGCATTCTGACCTTCAC     |
